# Supplementary material for: The Identification and Validation of a Robust Immune-Associated Gene Signature in Cutaneous Melanoma
Source: Hindawi journal article supplement (doi:10.1155/2021/6686284), 2021-02-19

# A Anatomic site(head and neck)

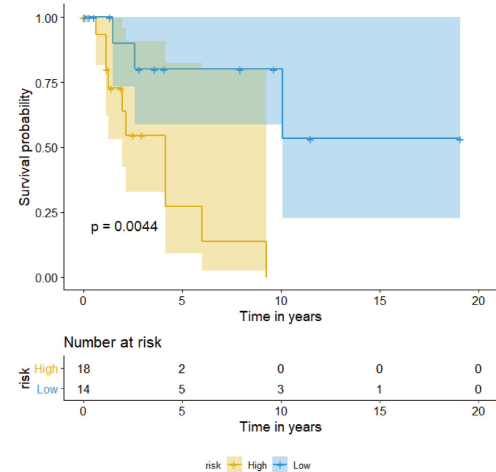

# Anatomic site(extremities)

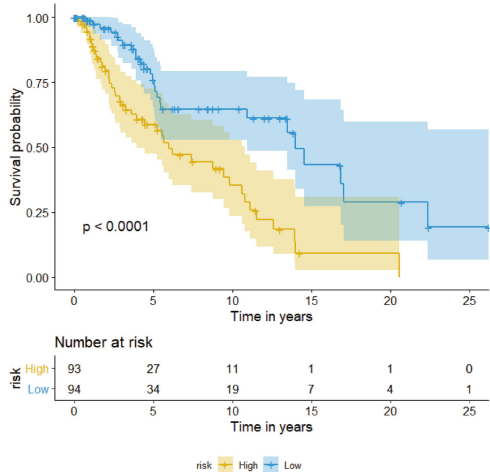

# Anatomic site(trunk)

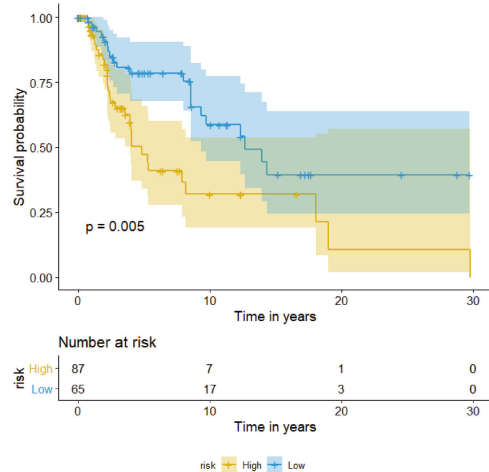

# tumor location (metastasis)

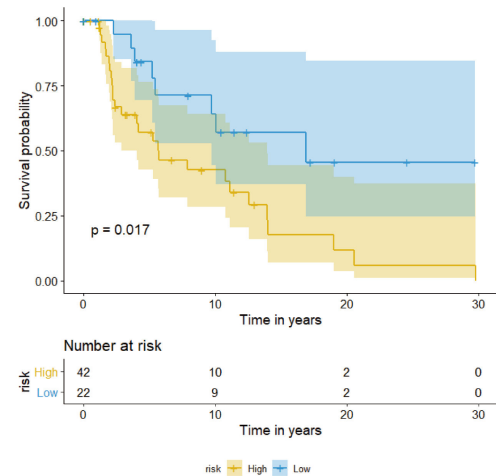

# tumor location(regional cutaneous)

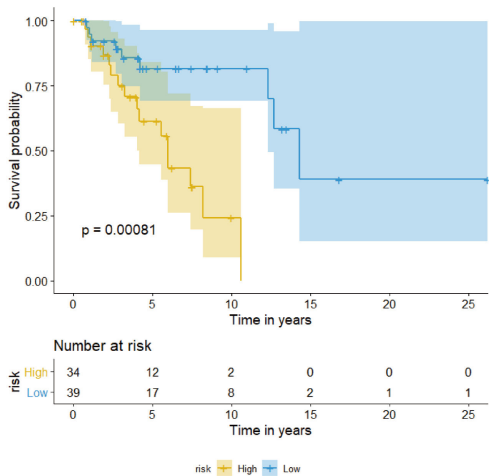

# tumor location (regional lymph)

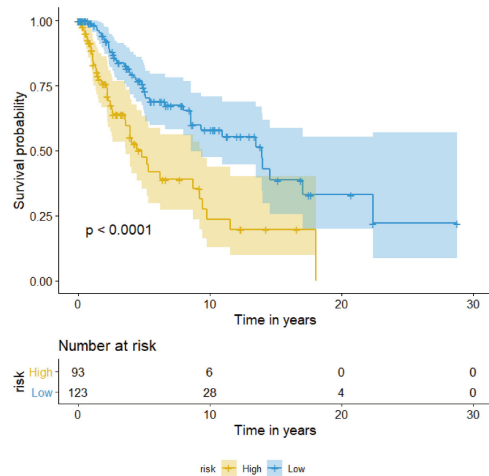

# Breslow depth(<2mm)

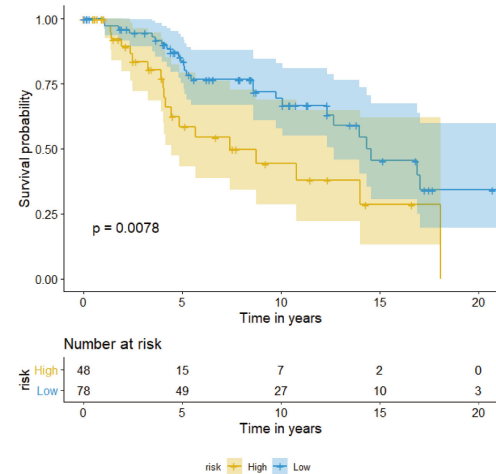

# clark level (1-2)

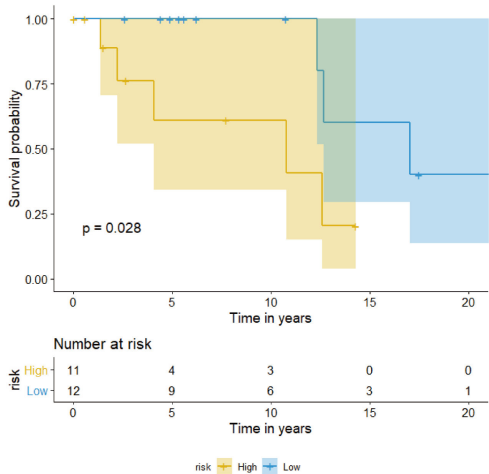

# clark level(3-4)

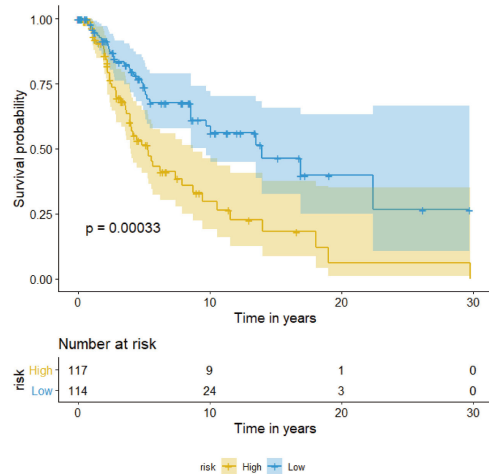

Supplement: f1 [file 6686284.f1.pdf]
