# Supplementary material for: The Identification and Validation of a Robust Immune-Associated Gene Signature in Cutaneous Melanoma
Source: Hindawi journal article supplement (doi:10.1155/2021/6686284), 2021-02-19

B

T0-T2

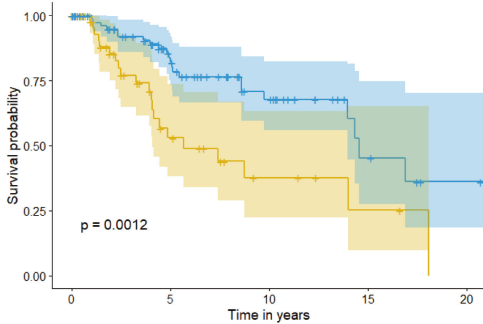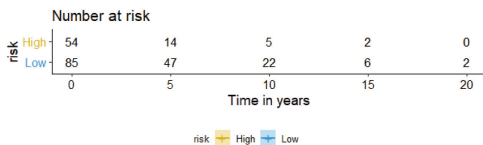

T3-T4

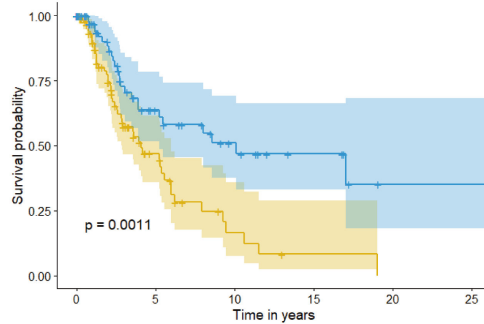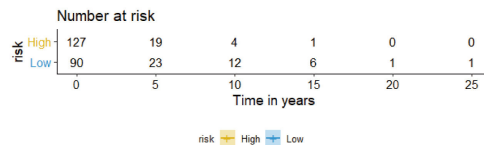

N0

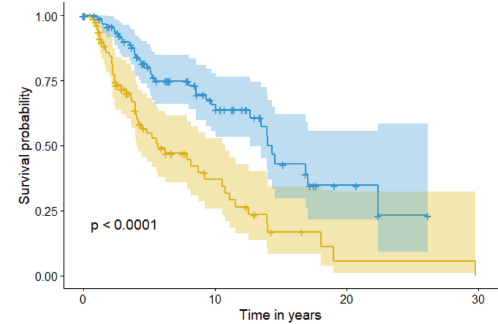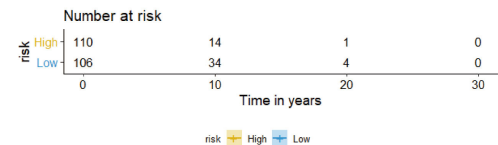

N1

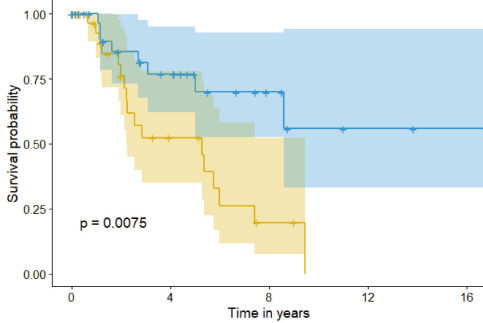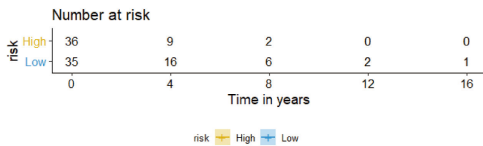

N3

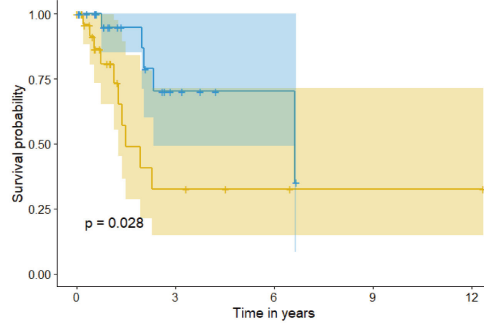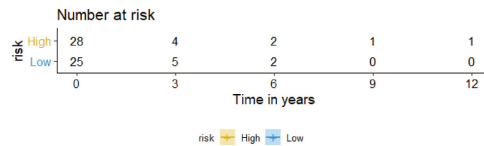

M0

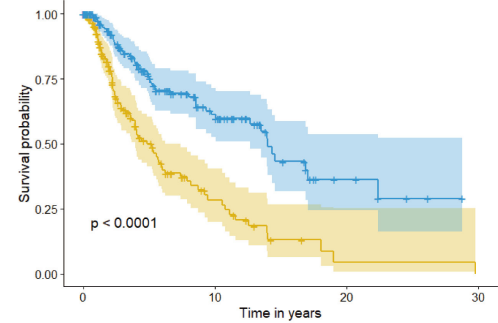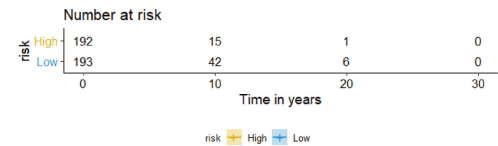

Supplement: f2 [file 6686284.f2.pdf]
