# Supplementary material for: The Identification and Validation of a Robust Immune-Associated Gene Signature in Cutaneous Melanoma
Source: Hindawi journal article supplement (doi:10.1155/2021/6686284), 2021-02-19

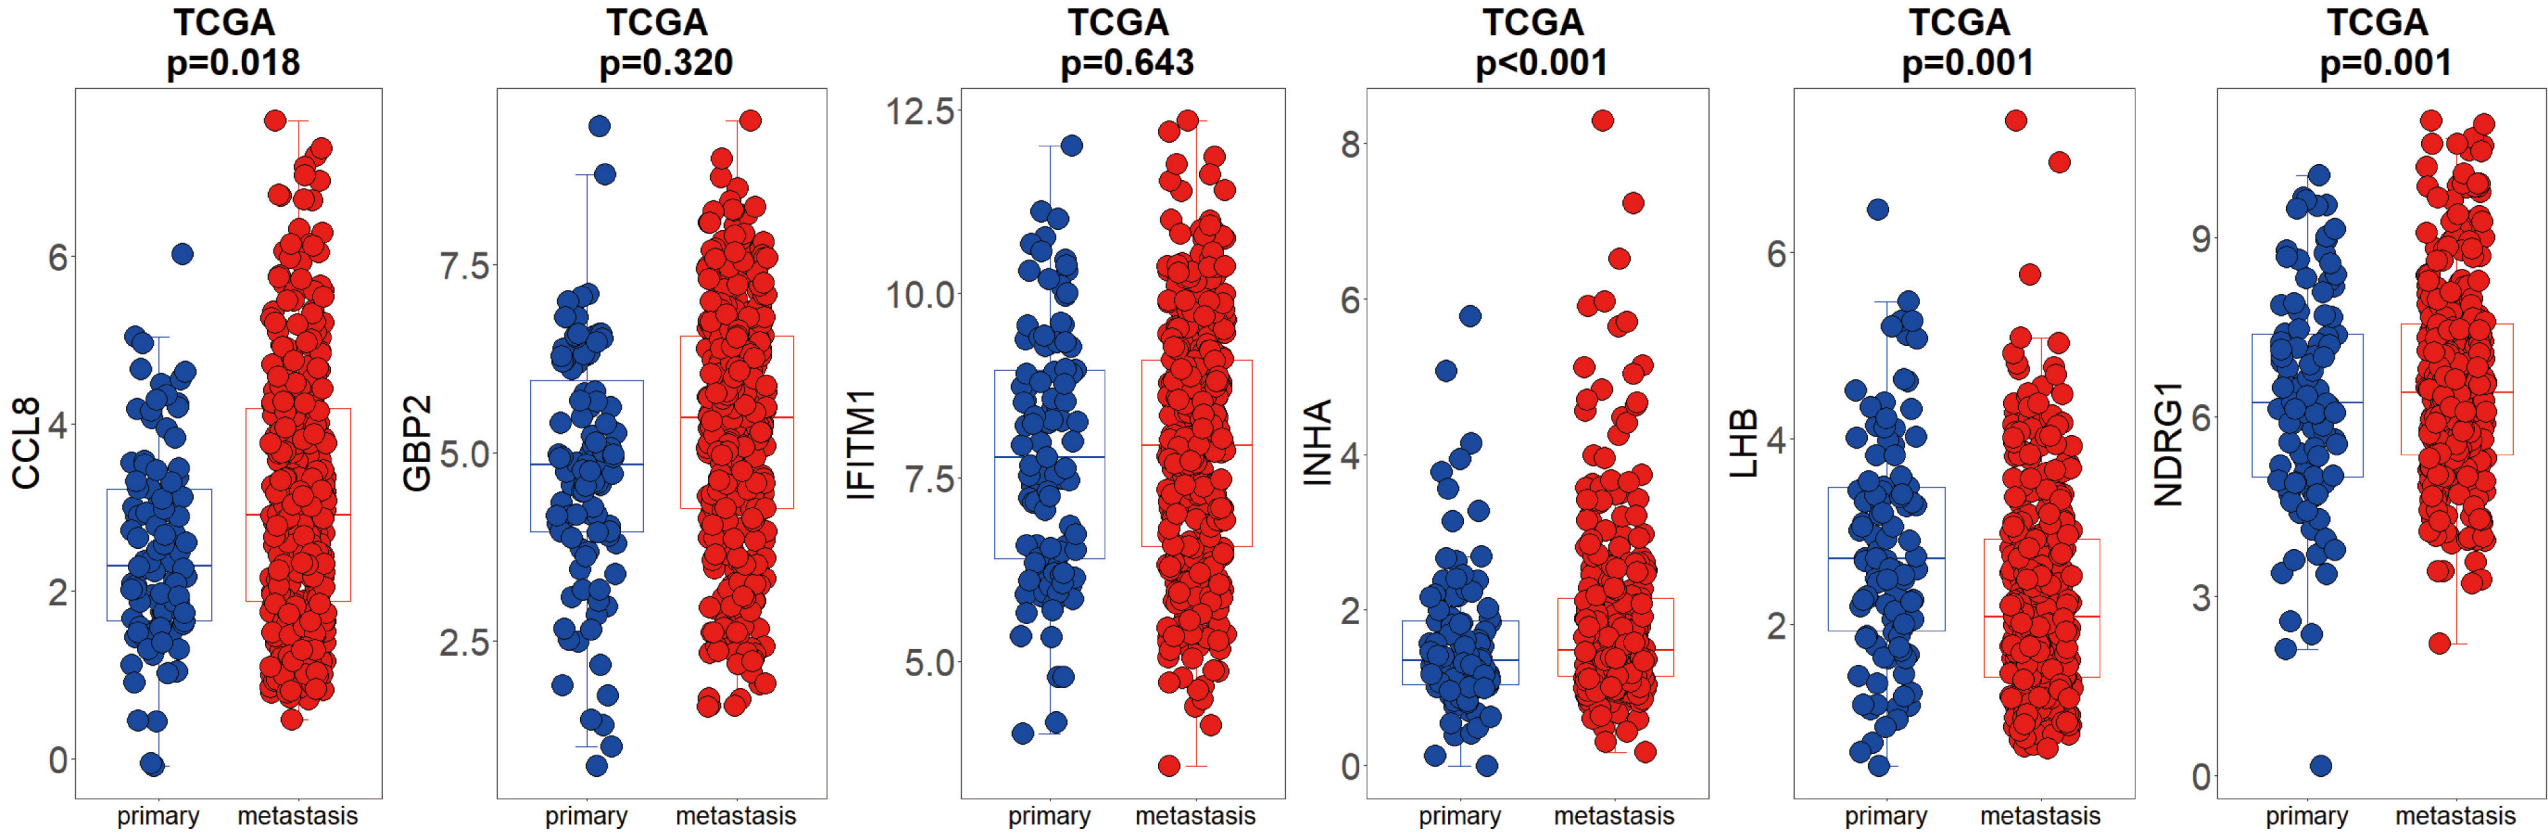

Supplement: f3 [file 6686284.f3.pdf]
